# Supplementary material for: Hypoglycemia is More Common Among Type 2 Diabetes Patients with Limited Health Literacy: The Diabetes Study of Northern California (DISTANCE)
Source: PubMed Central journal article supplement — J Gen Intern Med. 2010 May 18;25(9):962–8. doi: 10.1007/s11606-010-1389-7 (PMC2917655; doi:10.1007/s11606-010-1389-7), 2010-05-18
Supplement: 11606_2010_1389_MOESM1_ESM.pdf [file 11606_2010_1389_MOESM1_ESM.pdf]

Online Appendix

Appendix Table 1: Characteristics of Sample versus overall Survey respondents

|                                          | Current sample<br>(N=14,357)<br>N or mean<br>(% or SD) | Survey respondents<br>(N=20,188)<br>N or mean<br>(% or SD) | P-value |
|------------------------------------------|--------------------------------------------------------|------------------------------------------------------------|---------|
| Age (y)                                  | 58 (10)                                                | 56 (10)                                                    | 0.70    |
| Female sex                               | 7068 (49)                                              | 9840 (49)                                                  | 0.37    |
| Race/ Ethnicity                          |                                                        |                                                            |         |
| African-American                         | 2417 (17)                                              | 3420 (17)                                                  | 0.060   |
| Non-Hispanic White                       | 3202 (22)                                              | 4602 (23)                                                  |         |
| Latino/a                                 | 2632 (18)                                              | 3717 (18)                                                  |         |
| Asian                                    | 3265 (23)                                              | 4716 (23)                                                  |         |
| Other/Mixed                              | 2841 (20)                                              | 3733 (18)                                                  |         |
| Limited English Proficiency              | 1386 (10)                                              | 1771 (9)                                                   | 0.0054  |
| HbA1c%                                   | 7.6 (1.6)                                              | 7.5 (1.6)                                                  | <.0001  |
| Medication Type                          |                                                        |                                                            |         |
| Insulin                                  | 3141 (22)                                              | 4410 (26)                                                  | <0.0001 |
| Secretagogues only                       | 2284 (16)                                              | 2618 (15)                                                  |         |
| Metformin only                           | 2727 (19)                                              | 3087 (18)                                                  |         |
| Mixed Oral Meds                          | 6205 (43)                                              | 7058 (41)                                                  |         |
| Diabetes duration, yrs                   | 10 (8)                                                 | 10 (8)                                                     | 0.0309  |
| Perform self-monitoring of blood glucose | 6934 (48)                                              | 9208 (46)                                                  | <0.0001 |
| Problems learning                        | 5847 (52)                                              | 7182 (51)                                                  | 0.7146  |
| Help reading                             | 4266 (38)                                              | 5226 (38)                                                  | 0.6872  |
| Not confident with forms                 | 3266 (29)                                              | 3978 (29)                                                  | 0.5440  |
| Dementia                                 | 159 (1)                                                | 262 (1)                                                    | 0.1238  |
| Cerebrovascular disease/ stroke          | 382 (3)                                                | 536 (3)                                                    | 1.00    |
| Renal function                           |                                                        |                                                            |         |
| GFR >=90                                 | 2087 (17)                                              | 2810 (16)                                                  | 0.0810  |
| GFR 60-89                                | 7069 (56)                                              | 9814 (56)                                                  |         |
| GFR 30-59                                | 3037 (24)                                              | 4217 (24)                                                  |         |
| GFR 15-29                                | 219 (2)                                                | 307 (2)                                                    |         |
| GFR<15                                   | 135 (1)                                                | 244 (1)                                                    |         |
| Income                                   |                                                        |                                                            |         |
| >\$65,000                                | 4673 (38)                                              | 6447 (38)                                                  | 0.5280  |
| \$35,000-\$65,000                        | 3728 (30)                                              | 5190 (30)                                                  |         |
| \$25,000-\$34,999                        | 1472 (12)                                              | 2095 (12)                                                  |         |
| \$15,000-\$24,999                        | 1080 (9)                                               | 1557 (9)                                                   |         |
| <\$15,000                                | 1305 (11)                                              | 1805 (11)                                                  |         |
| Education                                |                                                        |                                                            |         |
| Less than High School                    | 6521 (46)                                              | 9040 (46)                                                  | 0.6544  |
| Some college                             | 3457 (24)                                              | 4929 (25)                                                  |         |
| College Graduate or more                 | 4151 (29)                                              | 5806 (29)                                                  |         |

Appendix Table 1 legend:

Since we intentionally restricted our analysis to those with type 2 diabetes and on medications, we are not trying to generalize beyond patients with those characteristics. The implications of differences between those in the analysis and the full sample are thus not clear, especially since in this large sample some differences are statistically significant but not clinically meaningful (e.g., a difference in the frequency of limited English proficiency (LEP) of 10% in our sample versus 9% of survey participants overall was statistically significant at  $p=0.005$ ). We did not observe clinically meaningful differences between the group we analyzed and the 20,188 survey respondents; therefore, we consider this potential selection bias to be of minimal concern.

Appendix Table 2: Adjusted models of the health literacy-hypoglycemia relationship

|                          | Unadjusted<br>Odds Ratio (95% CI) | Adjusted*<br>Odds Ratio (95% CI) | Adjusted†<br>Odds Ratio (95% CI) |
|--------------------------|-----------------------------------|----------------------------------|----------------------------------|
| Problems learning        | 1.5 (1.3-1.8)                     | 1.4 (1.1-1.7)                    | 1.3 (1.03-1.7)                   |
| Need help reading        | 1.5 (1.3-1.8)                     | 1.3 (1.1-1.6)                    | 1.4 (1.1-1.8)                    |
| Not confident with forms | 1.5 (1.3-1.8)                     | 1.3 (1.1-1.6)                    | 1.4 (1.1-1.8)                    |

\*Adjusted for age, gender, race/ethnicity, English proficiency, medication type, diabetes duration, HbA1c, glomerular filtration rate, income, dementia, history of stroke.

†Adjusted for age, gender, race/ethnicity, English proficiency, medication type, diabetes duration, HbA1c, glomerular filtration rate, income, dementia, history of stroke, alcohol use, BMI, neuropathy, and medication adherence.

Appendix Table 2 Legend:

Above, we show the adjusted odds ratios for limited health literacy on hypoglycemia, including the suggested co-variates of medication adherence, alcohol, neuropathy, and BMI. Health literacy remains associated with hypoglycemia, with minimal change in the odds ratios. However, some readers may consider adding these variables over-adjustment, particularly medication adherence, given the potential mediating effects on the association between literacy and hypoglycemia.
